# Supplementary material for: Synthesis, Structure and Antioxidant Activity of Cyclohexene-Fused Selenuranes and Related Derivatives
Source: MDPI journal article supplement (doi:10.3390/molecules200712670), 2015-07-13

# checkCIF/PLATON report

No syntax errors found.      CIF dictionary      Interpreting this report

## Datablock: ps-alse

---

Bond precision:    C-C = 0.0089 Å

Wavelength=0.71073

Cell:                    a=8.7358(12)            b=9.1761(12)            c=19.689(2)  
                          alpha=90                beta=116.096(8)           gamma=90  
Temperature:            295 K

|                        | Calculated    | Reported      |
|------------------------|---------------|---------------|
| Volume                 | 1417.4(3)     | 1417.4(3)     |
| Space group            | P 2/c         | P 1 2/c 1     |
| Hall group             | -P 2yc        | ?             |
| Moiety formula         | C14 H22 O2 Se | C14 H22 O2 Se |
| Sum formula            | C14 H22 O2 Se | C14 H22 O2 Se |
| Mr                     | 301.28        | 301.28        |
| Dx, g cm <sup>-3</sup> | 1.412         | 1.412         |
| Z                      | 4             | 4             |
| Mu (mm <sup>-1</sup> ) | 2.639         | 2.639         |
| F000                   | 624.0         | 624.0         |
| F000'                  | 623.86        |               |
| h,k,lmax               | 10,10,23      | 10,10,23      |
| Nref                   | 2550          | 2522          |
| Tmin,Tmax              | 0.458,0.810   | 0.251,1.000   |
| Tmin'                  | 0.232         |               |

Correction method= MULTI-SCAN

Data completeness= 0.989

Theta(max)= 25.190

R(reflections)= 0.0567( 1685)

wR2(reflections)= 0.1529( 2522)

S = 1.024

Npar= 158

---

The following ALERTS were generated. Each ALERT has the format

**test-name\_ALERT\_alert-type\_alert-level.**

Click on the hyperlinks for more details of the test.

---

### Alert level A

PLAT417\_ALERT\_2\_A Short Inter D-H..H-D            H1A    ..   H1A    ..            1.53 Ång.

---

### Alert level C

PLAT241\_ALERT\_2\_C Check High            Ueq as Compared to Neighbors for            Se  
PLAT241\_ALERT\_2\_C Check High            Ueq as Compared to Neighbors for            C4A

PLAT341\_ALERT\_3\_C Low Bond Precision on C-C Bonds (x 1000) Ang .. 9  
 PLAT234\_ALERT\_4\_C Large Hirshfeld Difference C3BA -- C4BA .. 0.20 Ang.

## Alert level G

PLAT301\_ALERT\_3\_G Note: Main Residue Disorder ..... 32.00 Perc.  
 PLAT860\_ALERT\_3\_G Note: Number of Least-Squares Restraints ..... 17  
 PLAT720\_ALERT\_4\_G Number of Unusual/Non-Standard Labels ..... 48  
 PLAT811\_ALERT\_5\_G No ADDSYM Analysis: Too Many Excluded Atoms .... !

1 **ALERT level A** = In general: serious problem  
 0 **ALERT level B** = Potentially serious problem  
 4 **ALERT level C** = Check and explain  
 4 **ALERT level G** = General alerts; check

0 ALERT type 1 CIF construction/syntax error, inconsistent or missing data  
 3 ALERT type 2 Indicator that the structure model may be wrong or deficient  
 3 ALERT type 3 Indicator that the structure quality may be low  
 2 ALERT type 4 Improvement, methodology, query or suggestion  
 1 ALERT type 5 Informative message, check

Publication of your CIF in IUCr Journals

A basic structural check has been run on your CIF. These basic checks will be run on all CIFs submitted for publication in IUCr Journals (*Acta Crystallographica*, *Journal of Applied Crystallography*, *Journal of Synchrotron Radiation*); however, if you intend to submit to *Acta Crystallographica Section C* or *E*, you should make sure that full publication checks are run on the final version of your CIF prior to submission.

Publication of your CIF in other journals

Please refer to the *Notes for Authors* of the relevant journal for any special instructions relating to CIF submission.

PLATON version of 13/08/2009; check.def file version of 12/08/2009

Datablock ps-alse - ellipsoid plot

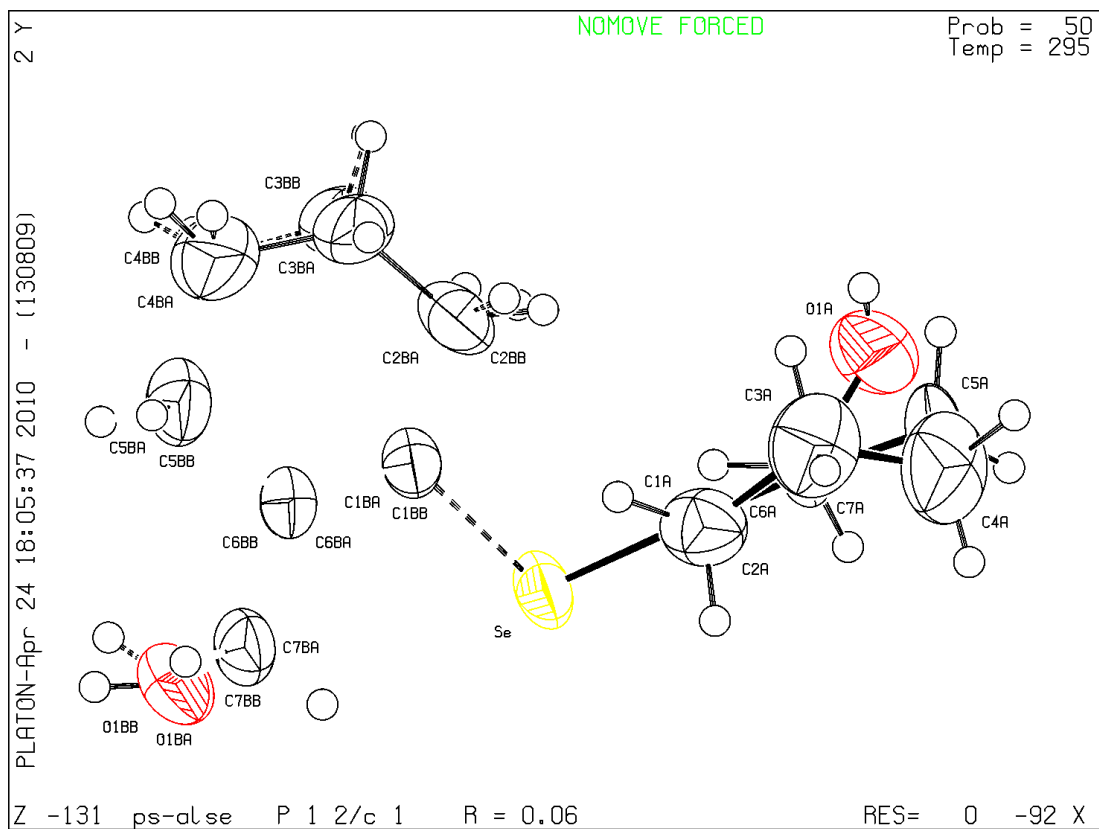

Supplement: s1 [file s1]
