# Supplementary material for: Synthesis, Structure and Antioxidant Activity of Cyclohexene-Fused Selenuranes and Related Derivatives
Source: MDPI journal article supplement (doi:10.3390/molecules200712670), 2015-07-13

# checkCIF/PLATON report

No syntax errors found.      CIF dictionary      Interpreting this report

## Datablock: te-spiro

---

Bond precision:    O- C = 0.0052 A                      Wavelength=1.54184

Cell:                      a=15.7046(2)              b=8.83038(16)              c=19.1603(3)  
                                alpha=90                      beta=90                      gamma=90

Temperature:              123 K

|                | Calculated    | Reported      |
|----------------|---------------|---------------|
| Volume         | 2657.11(7)    | 2657.11(8)    |
| Space group    | P b c a       | P b c a       |
| Hall group     | -P 2ac 2ab    | ?             |
| Moiety formula | C14 H16 O4 Te | C14 H16 O4 Te |
| Sum formula    | C14 H16 O4 Te | C14 H16 O4 Te |
| Mr             | 375.87        | 375.87        |
| Dx,g cm-3      | 1.879         | 1.879         |
| Z              | 8             | 8             |
| Mu (mm-1)      | 17.759        | 17.759        |
| F000           | 1472.0        | 1472.0        |
| F000'          | 1475.02       |               |
| h,k,lmax       | 19,10,23      | 19,10,23      |
| Nref           | 2676          | 2443          |
| Tmin,Tmax      | 0.014,0.142   | 0.233,1.000   |
| Tmin'          | 0.002         |               |

Correction method= MULTI-SCAN

Data completeness= 0.913                      Theta(max)= 73.540

R(reflections)= 0.0480( 2127)              wR2(reflections)= 0.1330( 2443)

S = 1.039                      Npar= 210

---

The following ALERTS were generated. Each ALERT has the format

**test-name\_ALERT\_alert-type\_alert-level.**

Click on the hyperlinks for more details of the test.

---

### Alert level A

PLAT029\_ALERT\_3\_A \_diffn\_measured\_fraction\_theta\_full Low ..... 0.93

---

### Alert level C

PLAT022\_ALERT\_3\_C Ratio Unique / Expected Reflections too Low .... 0.91

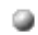

---

**Alert level G**

|                                                                    |             |
|--------------------------------------------------------------------|-------------|
| PLAT301_ALERT_3_G Note: Main Residue Disorder .....                | 39.00 Perc. |
| PLAT432_ALERT_2_G Short Inter X...Y Contact Te .. O2A ..           | 2.94 Ang.   |
| PLAT432_ALERT_2_G Short Inter X...Y Contact Te .. O2B ..           | 3.33 Ang.   |
| PLAT860_ALERT_3_G Note: Number of Least-Squares Restraints .....   | 72          |
| PLAT720_ALERT_4_G Number of Unusual/Non-Standard Labels .....      | 56          |
| PLAT779_ALERT_4_G Suspect or Irrelevant (Bond) Angle in CIF .... # | 7           |
| C1AA -TE -C1AB 1.555 1.555 1.555                                   | 1.30 Deg.   |
| PLAT779_ALERT_4_G Suspect or Irrelevant (Bond) Angle in CIF .... # | 13          |
| C1BB -TE -C1BA 1.555 1.555 1.555                                   | 2.20 Deg.   |
| PLAT779_ALERT_4_G Suspect or Irrelevant (Bond) Angle in CIF .... # | 82          |
| C6AB -C7A -C6AA 1.555 1.555 1.555                                  | 2.30 Deg.   |
| PLAT779_ALERT_4_G Suspect or Irrelevant (Bond) Angle in CIF .... # | 149         |
| C6BB -C7B -C6BA 1.555 1.555 1.555                                  | 2.80 Deg.   |
| PLAT811_ALERT_5_G No ADDSYM Analysis: Too Many Excluded Atoms .... | !           |

---

1 **ALERT level A** = In general: serious problem

0 **ALERT level B** = Potentially serious problem

1 **ALERT level C** = Check and explain

10 **ALERT level G** = General alerts; check

0 ALERT type 1 CIF construction/syntax error, inconsistent or missing data

2 ALERT type 2 Indicator that the structure model may be wrong or deficient

4 ALERT type 3 Indicator that the structure quality may be low

5 ALERT type 4 Improvement, methodology, query or suggestion

1 ALERT type 5 Informative message, check

---

## Datablock te-spiro - ellipsoid plot

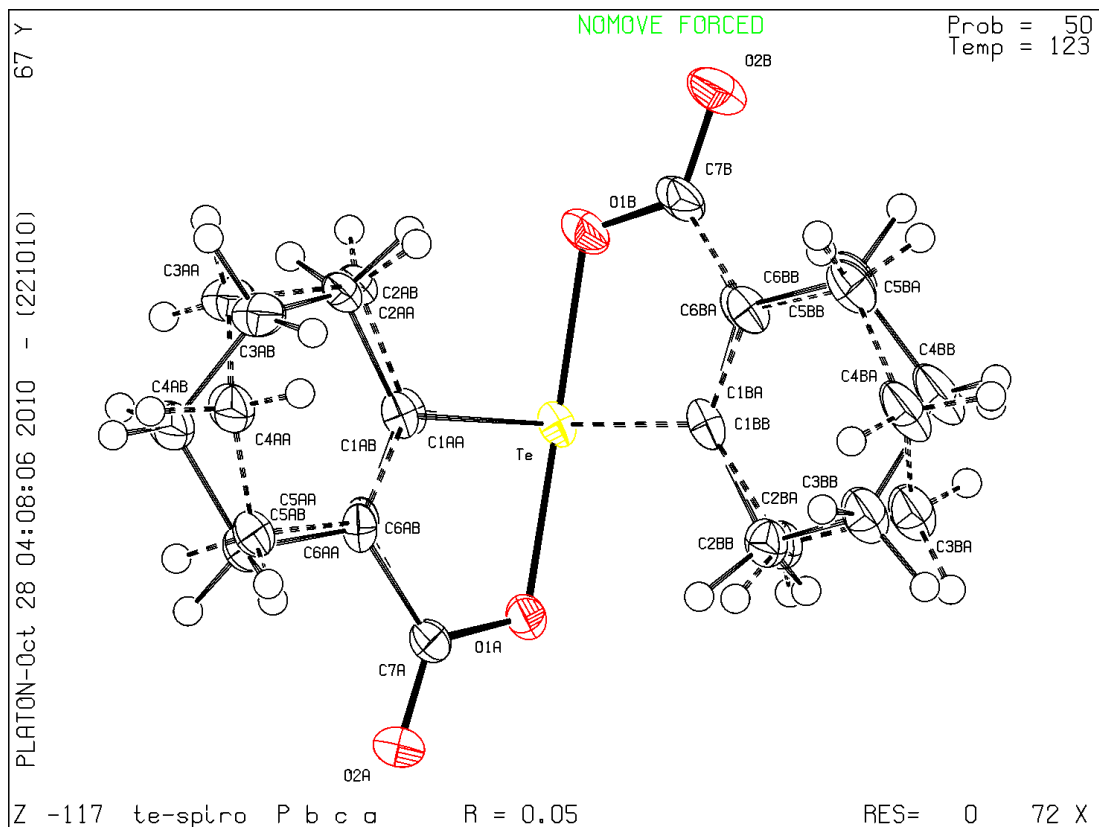

Supplement: s1 [file s1]
