# Supplementary material for: Synthesis, Structure and Antioxidant Activity of Cyclohexene-Fused Selenuranes and Related Derivatives
Source: MDPI journal article supplement (doi:10.3390/molecules200712670), 2015-07-13
Supplement: s1 [file s1]

# Supporting Information

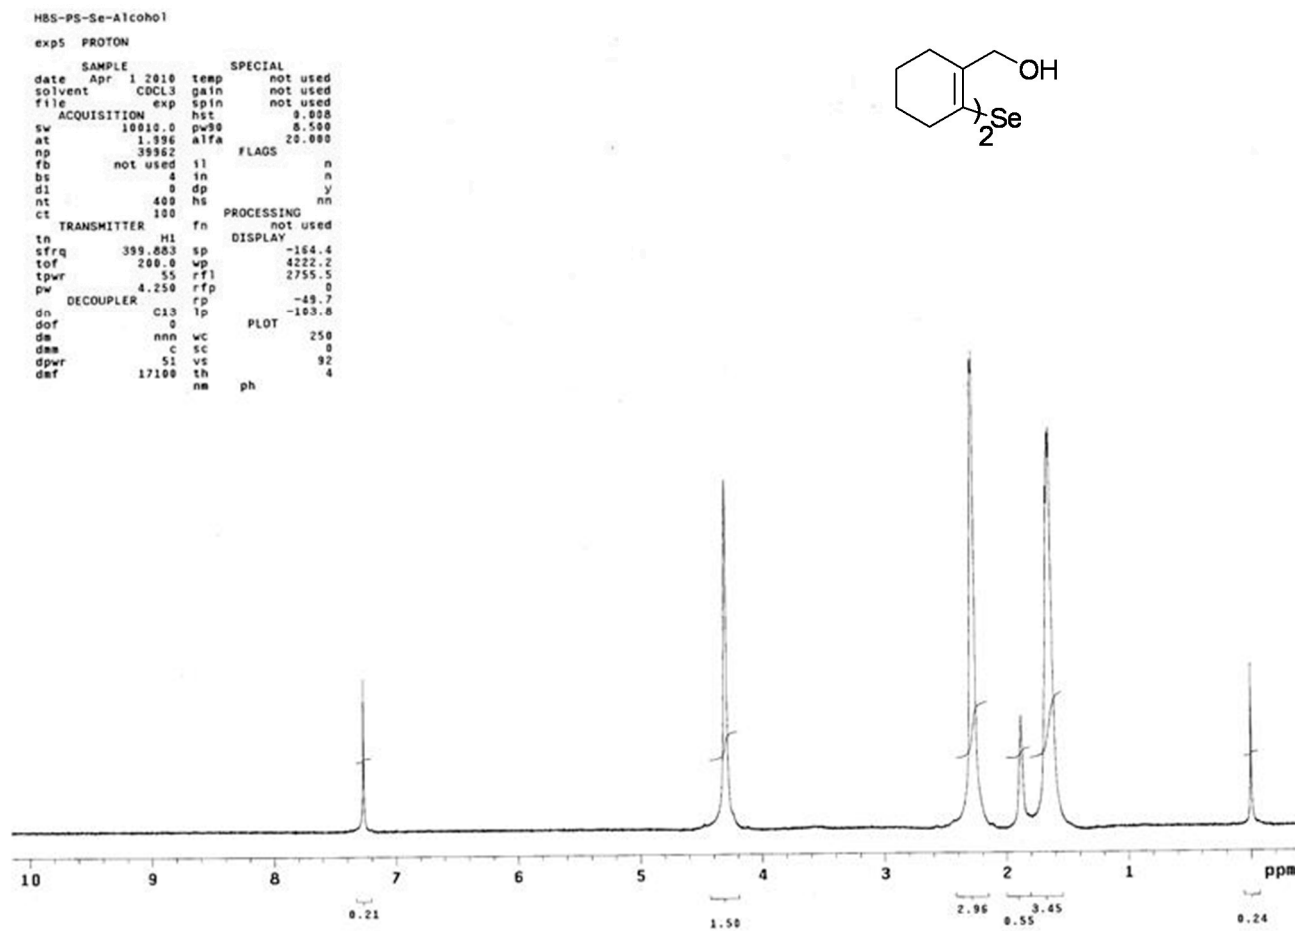

Figure S1.  $^1\text{H}$ -NMR spectrum of **19** ( $\text{CDCl}_3$ ).

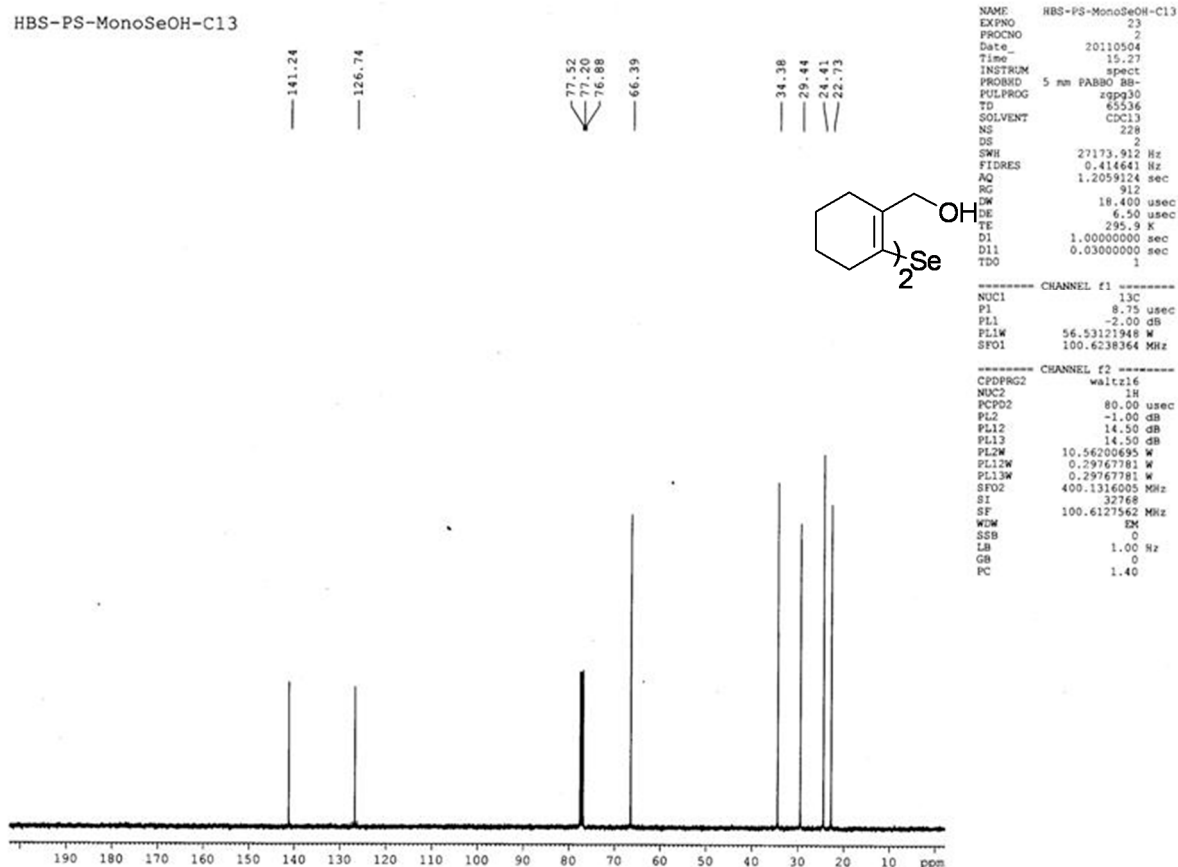Figure S2.  $^{13}\text{C}$ -NMR spectrum of **19** ( $\text{CDCl}_3$ ).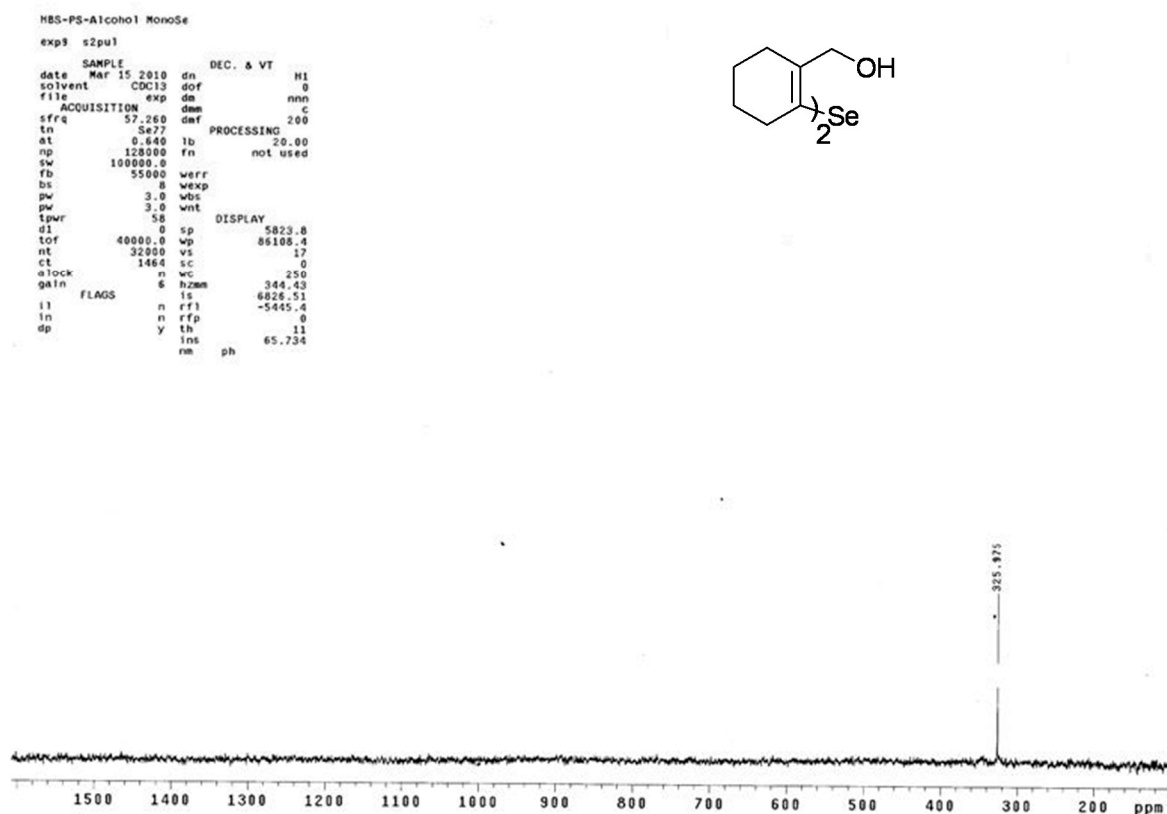Figure S3.  $^{77}\text{Se}$ -NMR spectrum of **19** ( $\text{CDCl}_3$ ).

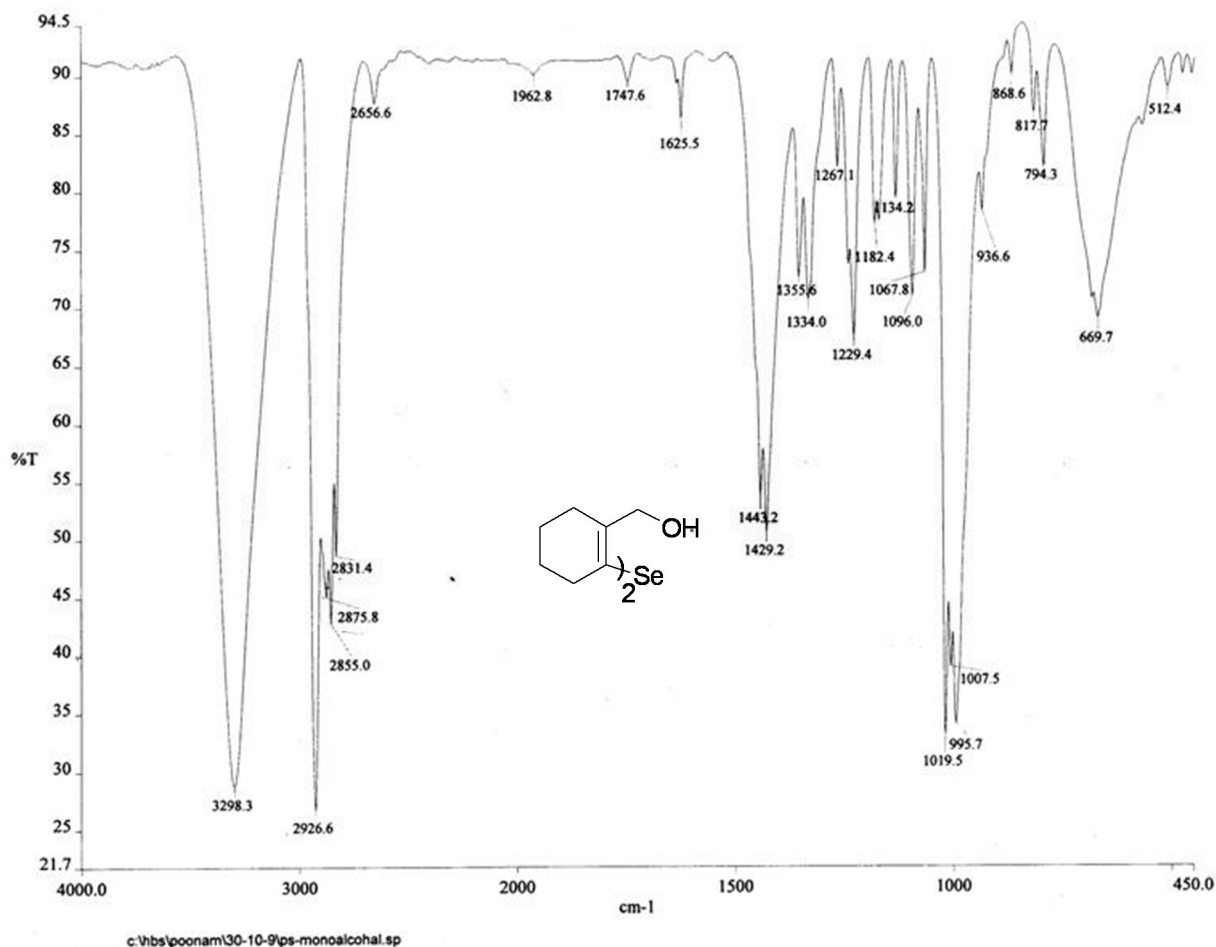

Figure S4. FT-IR spectrum of 19.

## Elemental Composition Report

## Single Mass Analysis (displaying only valid results)

Tolerance = 10.0 PPM / DBE: min = -1.5, max = 50.0

Isotope cluster parameters: Separation = 1.0 Abundance = 1.0%

Monoisotopic Mass, Odd and Even Electron Ions

22 formula(e) evaluated with 1 results within limits (up to 50 closest results for each mass)

Micromass : Q-ToF micro (YA-105)

Dept. Of Chemistry I.I.T.(B)

27-May-2011 12:12:03

C<sub>14</sub>H<sub>22</sub>O<sub>2</sub>Se

HBS-PS-ALCOHOL SE 83 (0.822) AM (Cen, 5, 80.00, Ht, 5000.0, 556.28, 1.00); Sm (Md, 6.00); Sb (5, 40.00); Cm (58:83)

TOF MS ES+  
2.75e3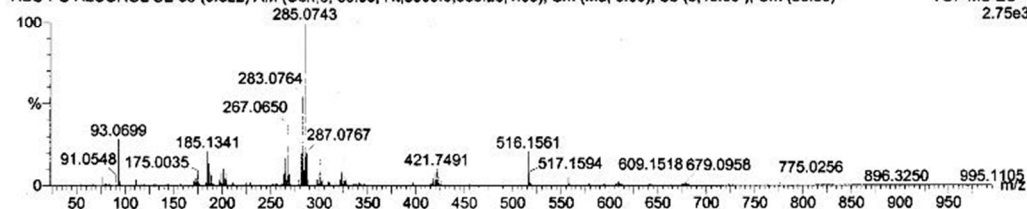

|          |            |     |     |     |       |                                                      |
|----------|------------|-----|-----|-----|-------|------------------------------------------------------|
| Minimum: |            |     |     |     |       |                                                      |
| Maximum: |            |     |     |     |       |                                                      |
| Mass     | Calc. Mass | mDa | PPM | DBE | Score | Formula                                              |
| 325.0688 | 325.0683   | 0.5 | 1.7 | 4.5 | 1     | C <sub>14</sub> H <sub>22</sub> O <sub>2</sub> Se Na |

Figure S5. HRMS spectrum of 19.

## Eager 300 Report

Page: 1 Sample: PS1 (PS1)

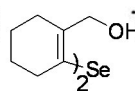

Method Name : SP061109  
 Method File : D:\CHNS2008\SP061109.mth  
 Chromatogram : PS1  
 Operator ID : SP  
 Analysed : 11/06/2009 09:03  
 Sample ID : PS1 (# 6)  
 Analysis Type : UnkNown (Area)

Company Name : C.E. Instruments  
 Printed : 11/6/2009 13:10  
 Instrument N. : Instrument #1  
 Sample weight : .654

Calib. method : using 'K Factors'

!!! Warning missing one or more peaks.

| Element Name | %     | Ret.Time | Area | BC        | Area ratio | K factor    |
|--------------|-------|----------|------|-----------|------------|-------------|
| Carbon       | 55.81 | 56.1831  | 67   | 909526 RS | 1.000000   | .246719E+07 |
| Hydrogen     | 7.36  | 6.9764   | 175  | 247576 RS | 3.673724   | .525645E+07 |
| Totals       |       | 63.1596  |      | 1157102   |            |             |

Figure S6. Elemental analysis (CHN) of 19.

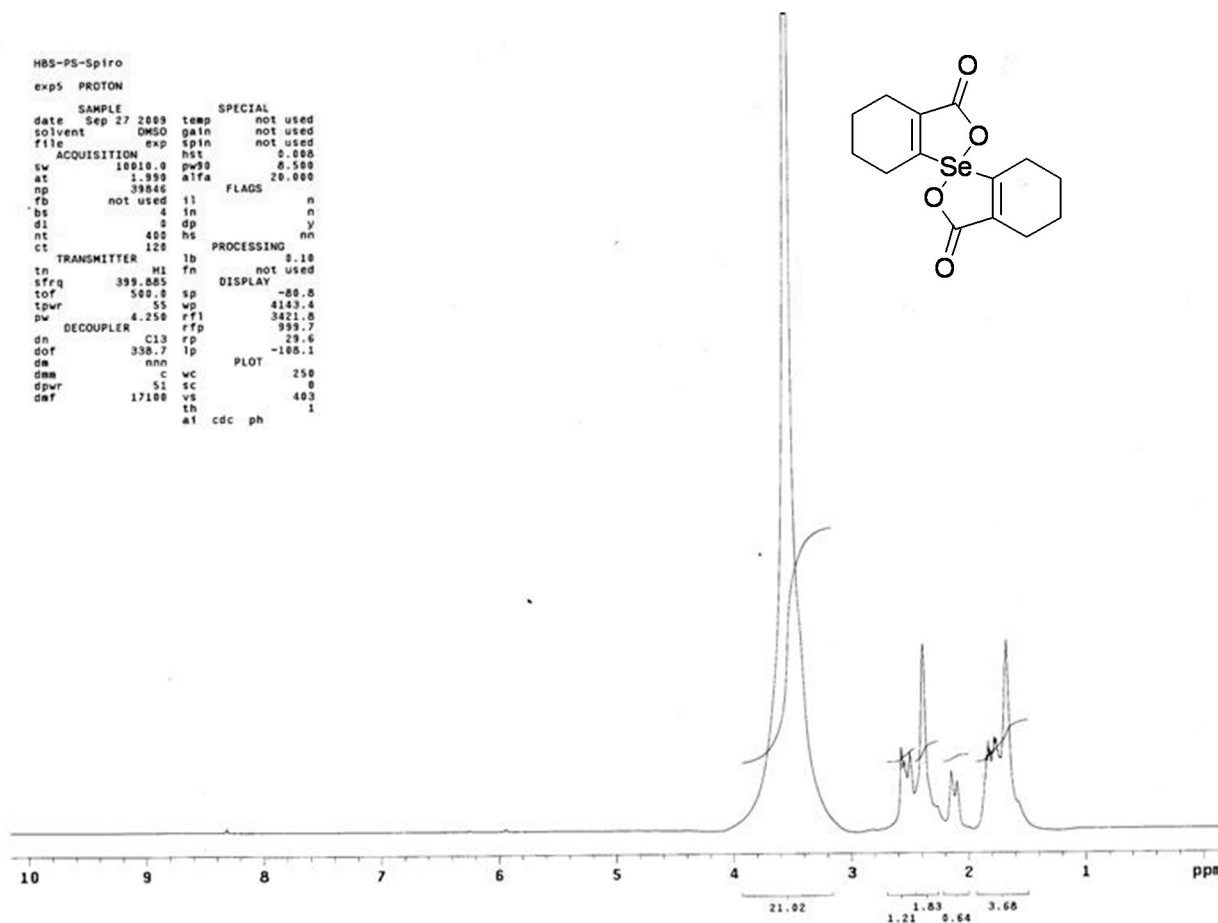Figure S7. <sup>1</sup>H-NMR spectrum of 20 (CDCl<sub>3</sub>).

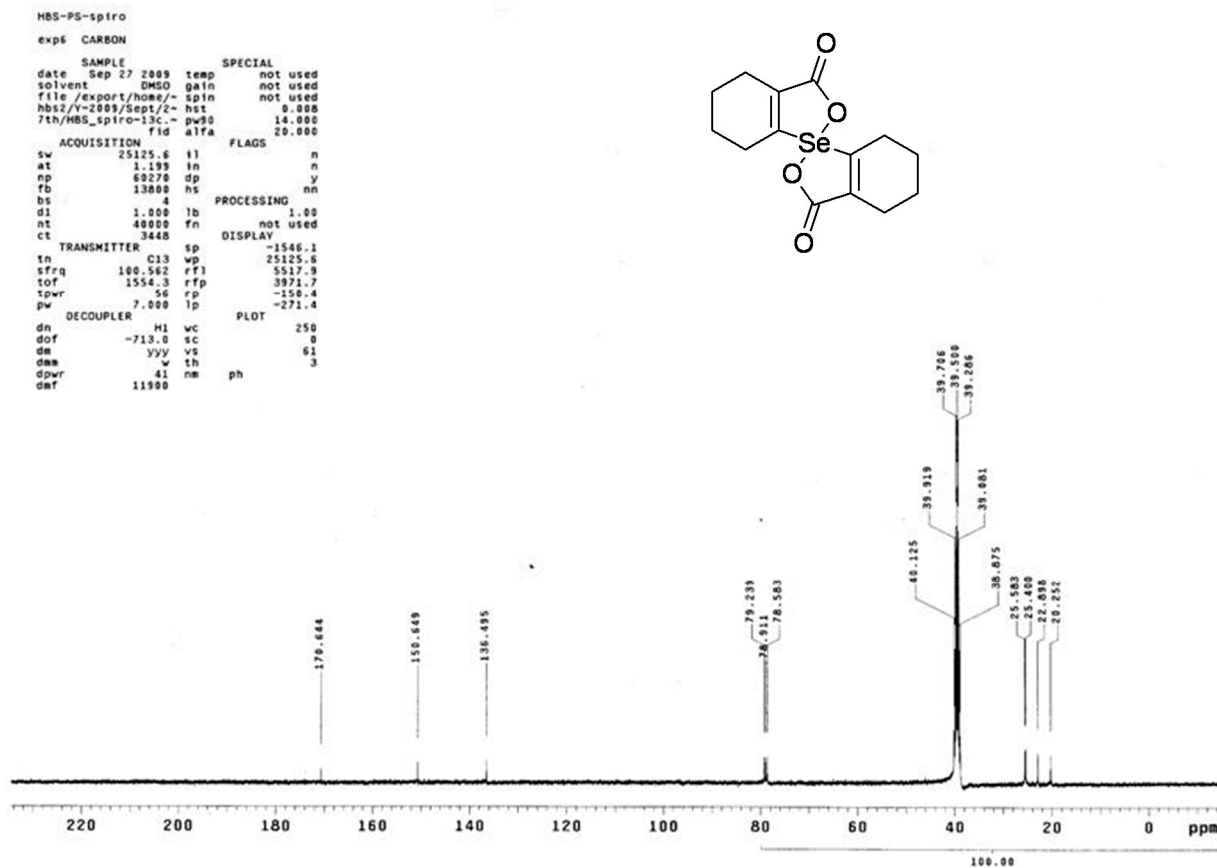Figure S8. <sup>13</sup>C-NMR spectrum of **20** (CDCl<sub>3</sub>).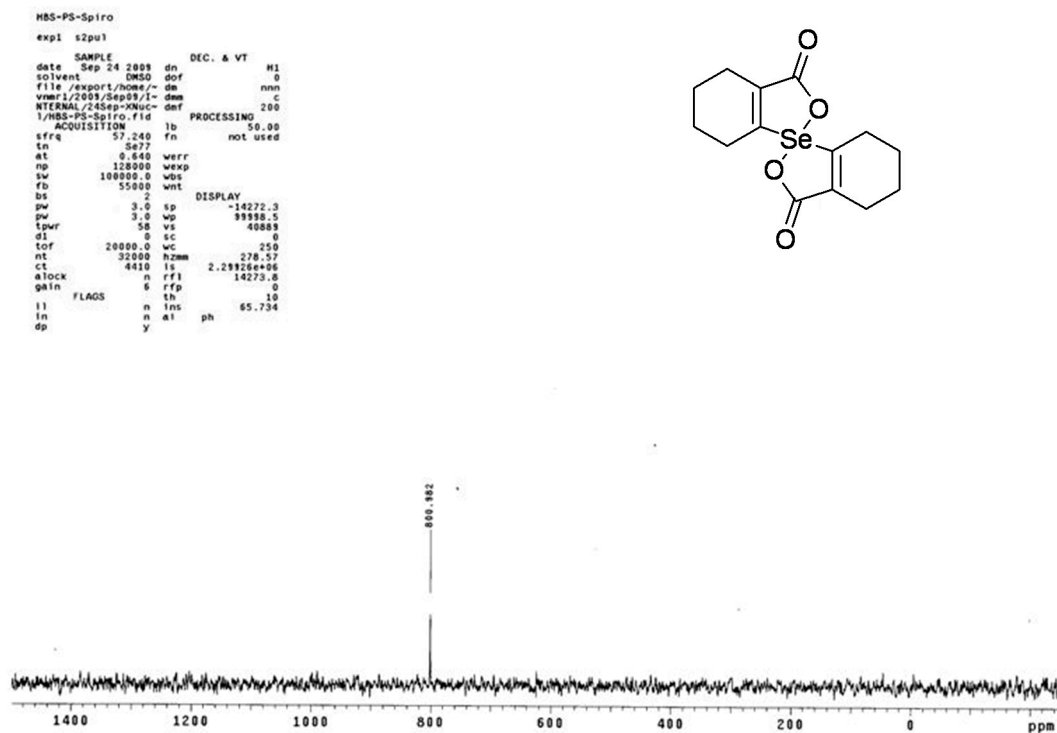Figure S9. <sup>77</sup>Se-NMR spectrum of **20** (CDCl<sub>3</sub>).

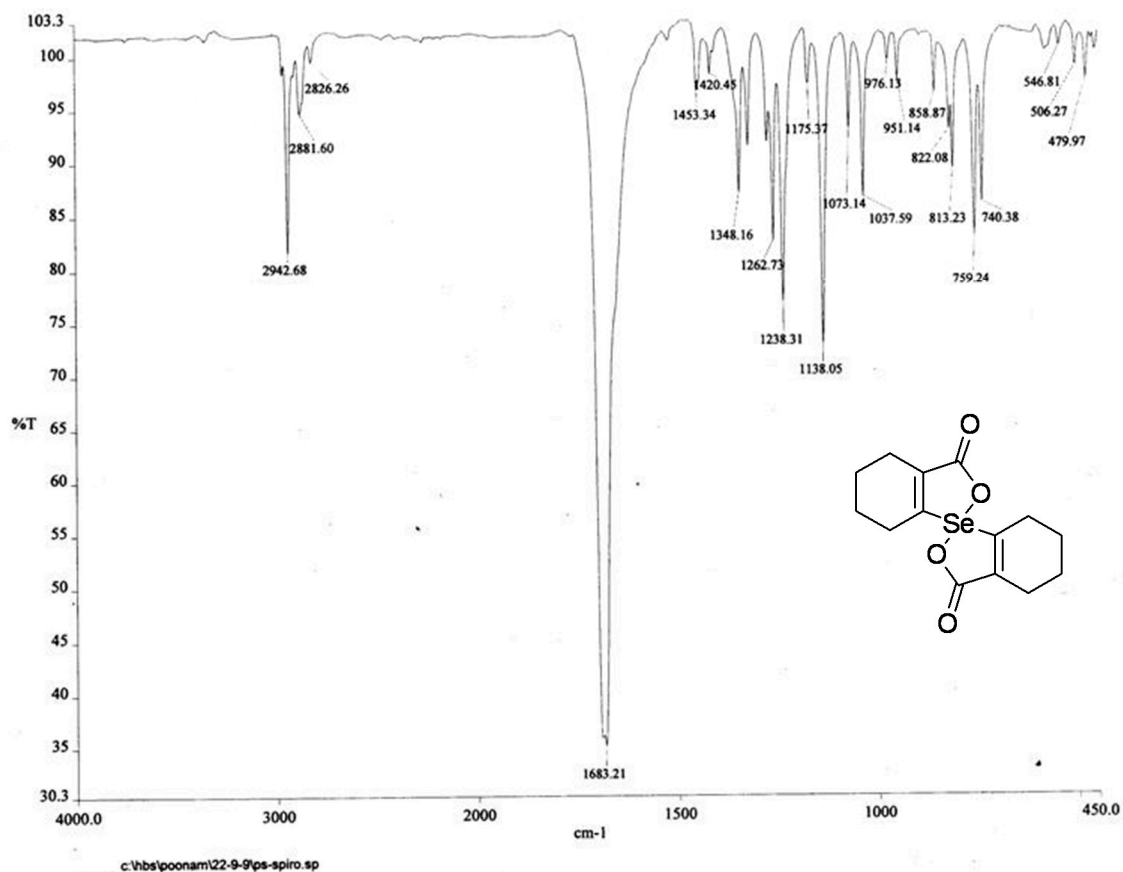

Figure S10. FT-IR spectrum of 20.

## Elemental Composition Report

## Single Mass Analysis (displaying only valid results)

Tolerance = 10.0 PPM / DBE: min = -1.5, max = 50.0

Isotope cluster parameters: Separation = 1.0 Abundance = 1.0%

Monoisotopic Mass, Odd and Even Electron Ions

9 formula(e) evaluated with 1 results within limits (all results (up to 1000) for each mass)

Micromass : Q-ToF micro (YA-105)

Department Of Chemistry I.I.T.(B)

05-Aug-2010 15:19:45

C<sub>14</sub>H<sub>16</sub>O<sub>4</sub>Se

HBS-PS-SESPIRO 10 (0.186) AM (Top, 4, Ht, 5700.0, 556.28, 0.76); Sb (5, 40.00); Cm (1, 33)

Ionisation Mode

TOF MS ES+

6.64e3

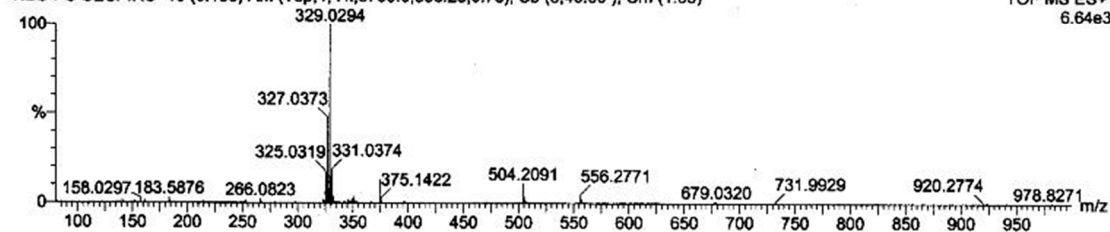

Minimum:

Maximum:

200.0

10.0

-1.5

50.0

Mass

Calc. Mass

mDa

PPM

DBE

Score

Formula

329.0294

329.0292

0.2

0.7

7.5

1

C<sub>14</sub> H<sub>17</sub> O<sub>4</sub> Se

Figure S11. HRMS spectrum of 20.

## Eager 300 Report

Page: 1 Sample: TE-SPIRO (TE-SPIRO)

Method Name : SP280110  
 Method File : D:\CHNS2008\SP280110.mth  
 Chromatogram : TE-SPIRO  
 Operator ID : MP  
 Analysed : 01/28/2010 12:32  
 Sample ID : TE-SPIRO (# 12)  
 Analysis Type : UnkNown (Area)

Company Name : C.E. Instruments  
 Printed : 1/28/2010 14:59  
 Instrument N. : Instrument #1  
 Sample weight : 1.078

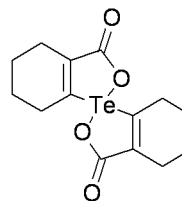

Calib. method : using 'K Factors'

!!! Warning missing one or more peaks.

| Element Name | %     | Ret.Time | Area | BC         | Area ratio | K factor    |
|--------------|-------|----------|------|------------|------------|-------------|
| Carbon       | 44.74 | 45.0227  | 67   | 1198946 RS | 1.000000   | .246135E+07 |
| Hydrogen     | 4.29  | 5.3807   | 172  | 325334 RS  | 3.685276   | .540442E+07 |
| Totals       |       | 50.4034  |      | 1524280    |            |             |

Figure S12. Elemental analysis (CHN) of 20.

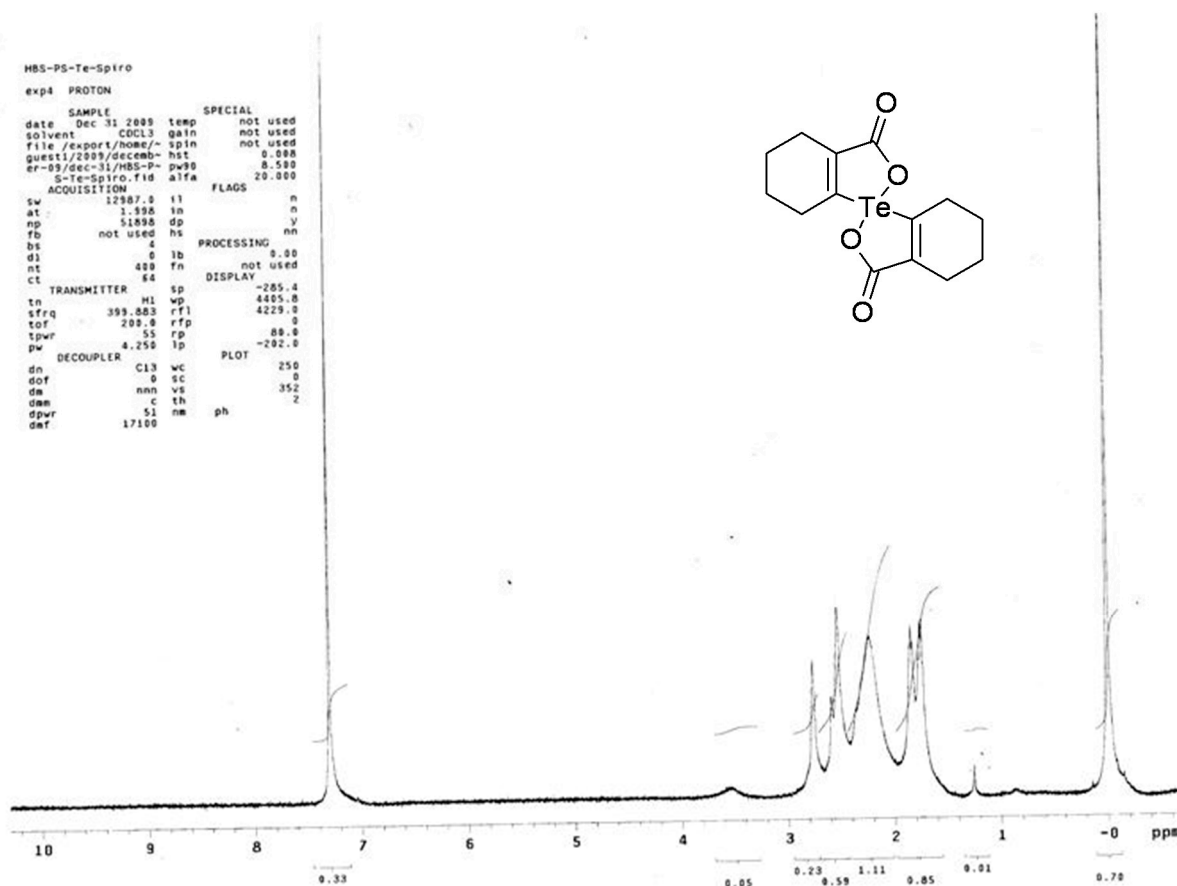Figure S13. <sup>1</sup>H-NMR spectrum of 21 (CDCl<sub>3</sub>).

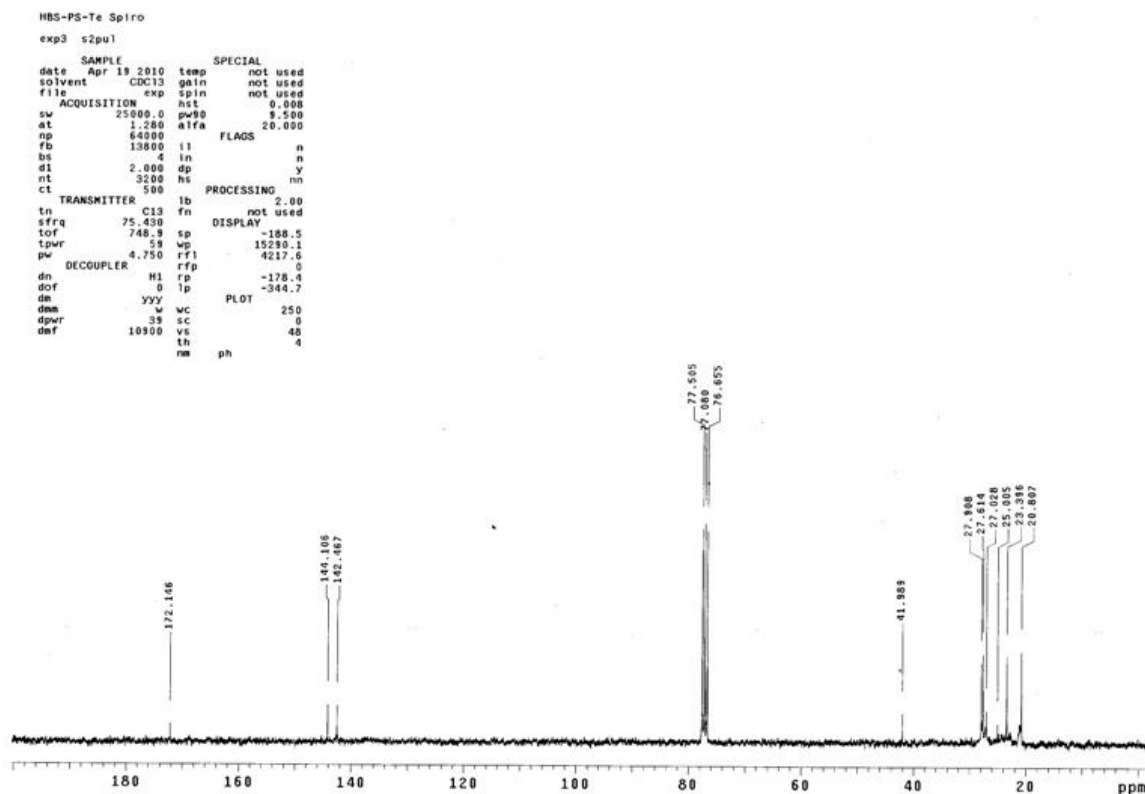Figure S14.  $^{13}\text{C}$ -NMR spectrum of **21** ( $\text{CDCl}_3$ ).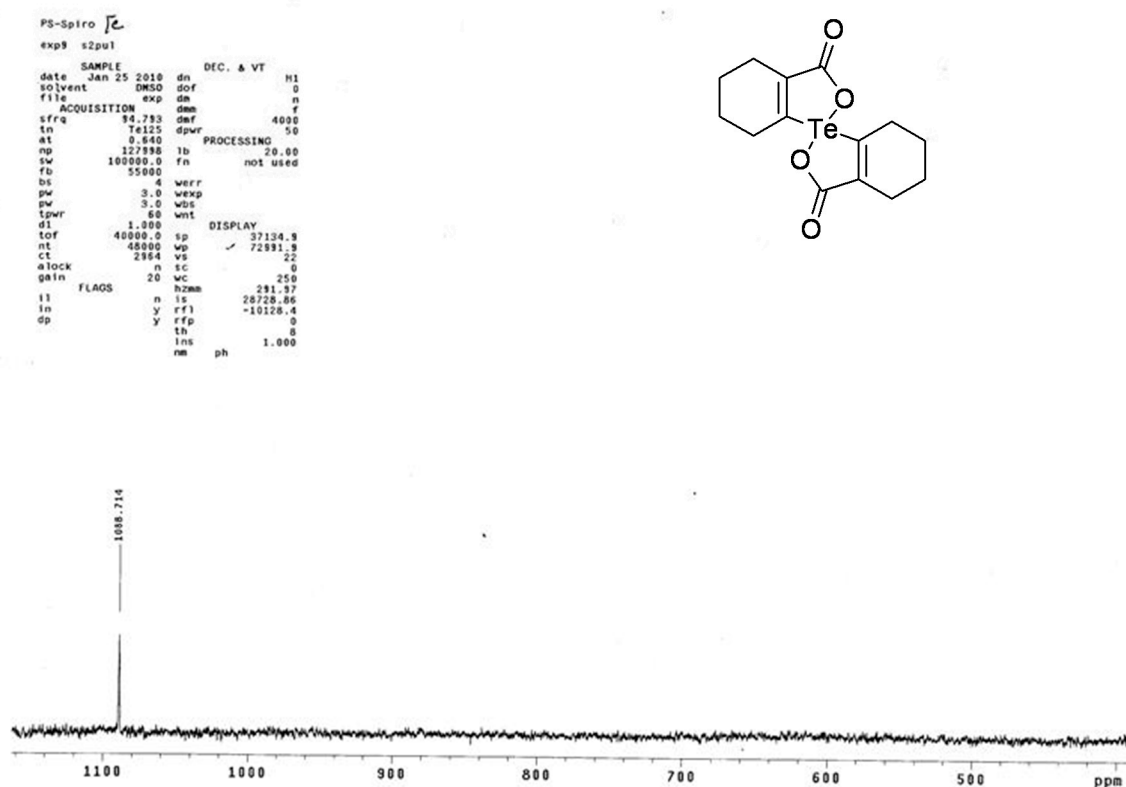Figure S15.  $^{125}\text{Te}$ -NMR spectrum of **21** ( $\text{CDCl}_3$ ).



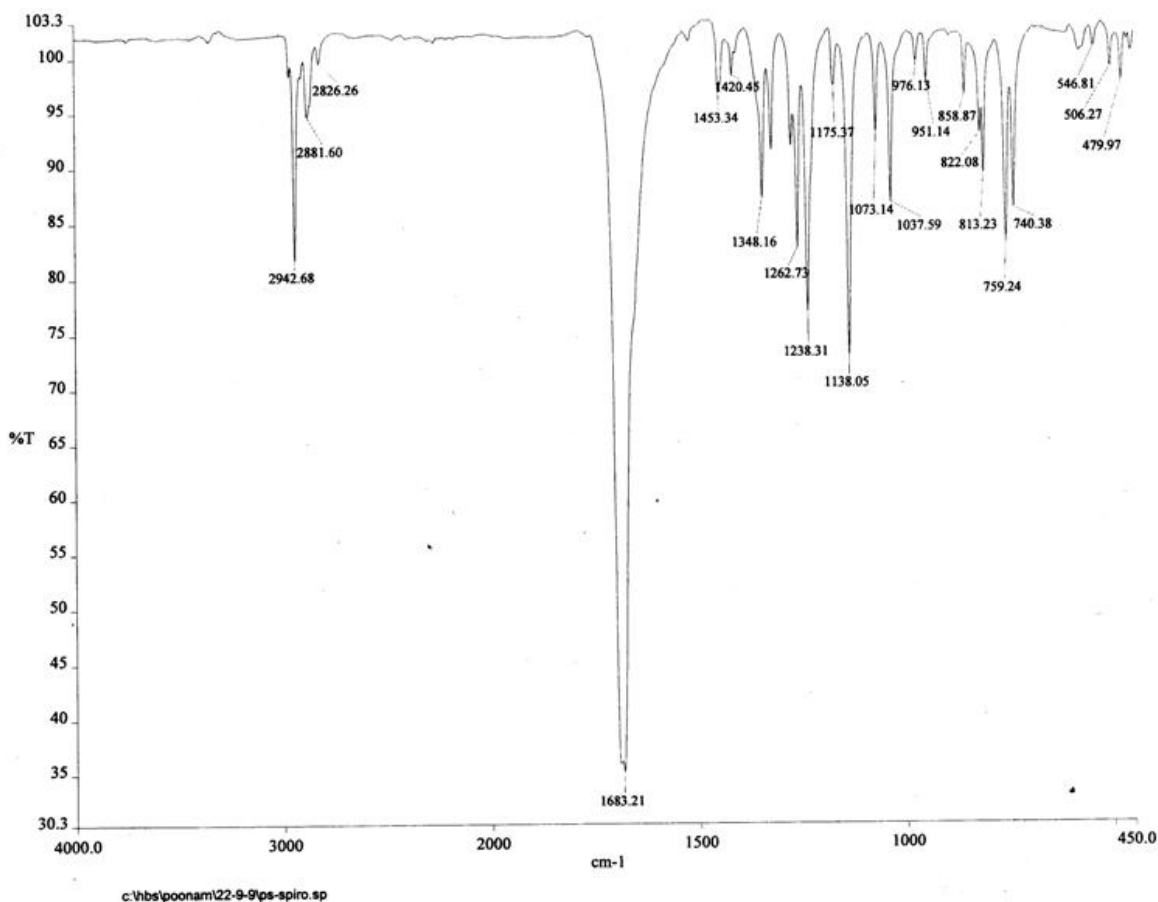

Figure S16. FT-IR spectrum of 21.

## Elemental Composition Report

## Single Mass Analysis (displaying only valid results)

Tolerance = 10.0 PPM / DBE: min = -1.5, max = 50.0

Isotope cluster parameters: Separation = 1.0 Abundance = 1.0%

Monoisotopic Mass, Odd and Even Electron Ions

19 formula(e) evaluated with 1 results within limits (all results (up to 1000) for each mass)

Micromass : Q-ToF micro (YA-105)

Department Of Chemistry I.I.T.(B)

05-Aug-201015:39:39

C<sub>14</sub>H<sub>16</sub>O<sub>4</sub>Te

HBS-PS-TESPIRO 29 (0.537) AM (Cen,4, 80.00, Ht,5700.0,556.28,0.76); Sm (SG, 2x4.00); Sb (5,40.00); Cm (1:56)

Ionisation Mode  
TOF MS ES+  
4.20e3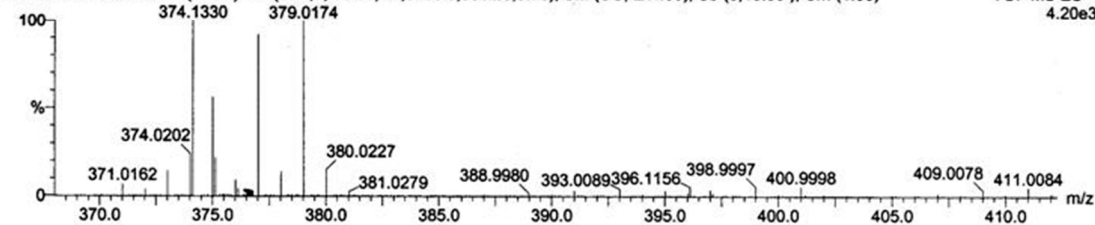

Minimum:

Maximum:

200.0 10.0 -1.5

| Mass     | Calc. Mass | mDa  | PPM  | DBE | Score | Formula                                           |
|----------|------------|------|------|-----|-------|---------------------------------------------------|
| 379.0174 | 379.0189   | -1.5 | -3.9 | 6.5 | 1     | C <sub>14</sub> H <sub>17</sub> O <sub>4</sub> Te |

Figure S17. HRMS spectrum of 21.

## Eager 300 Report

Page: 1 Sample: HBSPSCHALC (HBSPSCHALC) H<sub>2</sub>O<sub>2</sub>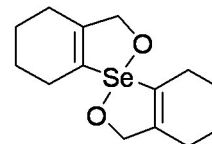

Method Name : SP040610  
 Method File : D:\CHNS2008\SP040610.mth  
 Chromatogram : HBSPSCHALC  
 Operator ID : SP  
 Analysed : 06/04/2010 13:49  
 Sample ID : HBSPSCHALC (# 16)  
 Analysis Type : UnkNown (Area)

Company Name : C.E. Instruments  
 Printed : 6/4/2010 15:45  
 Instrument N. : Instrument #1  
 Sample weight : .682

Calib. method : using 'K Factors'

!!! Warning missing one or more peaks.

| Element Name | %       | Ret.Time | Area    | BC | Area ratio | K factor    |
|--------------|---------|----------|---------|----|------------|-------------|
| Carbon       | 54.4053 | 67       | 1003864 | RS | 1.000000   | .268468E+07 |
| Hydrogen     | 7.1917  | 169      | 445628  | RS | 2.252695   | .687010E+07 |
| Totals       | 61.5970 |          | 1449492 |    |            |             |

Figure S18. Elemental analysis (CHN) of 21.

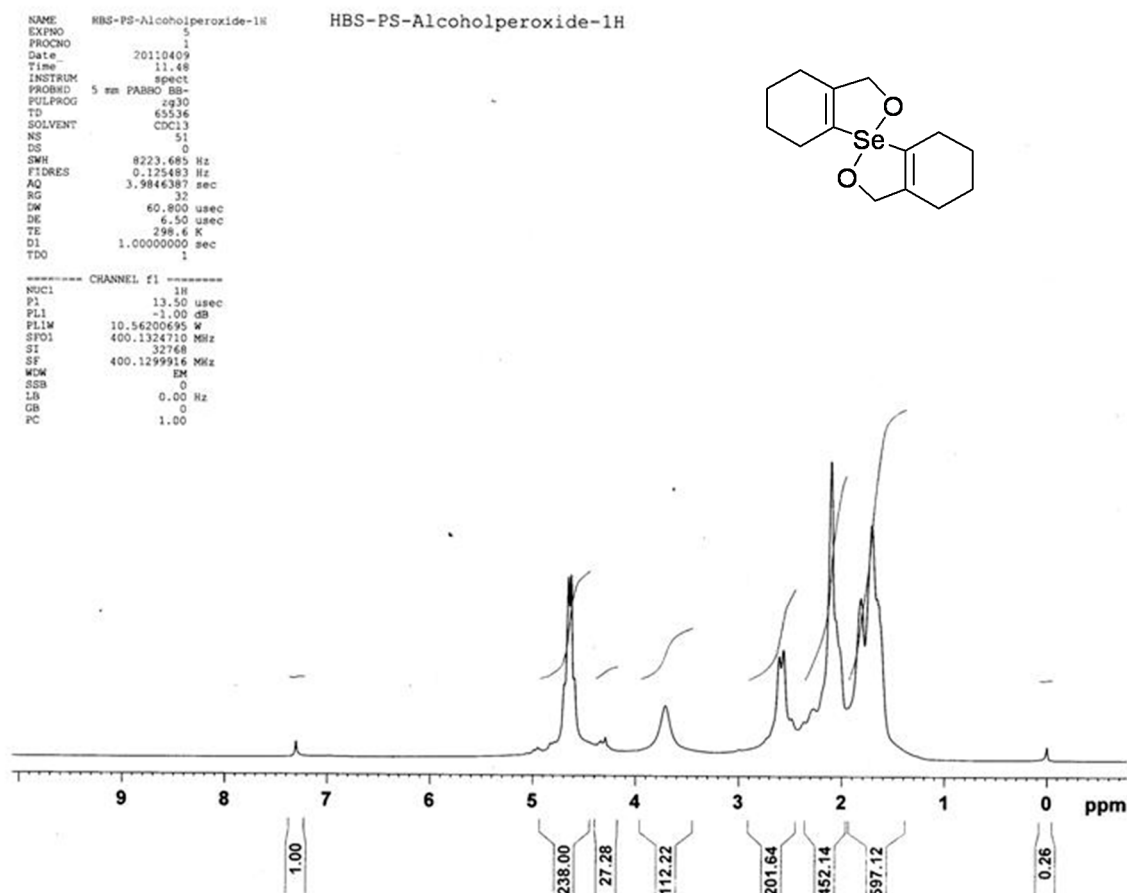

Figure S19. Cont.

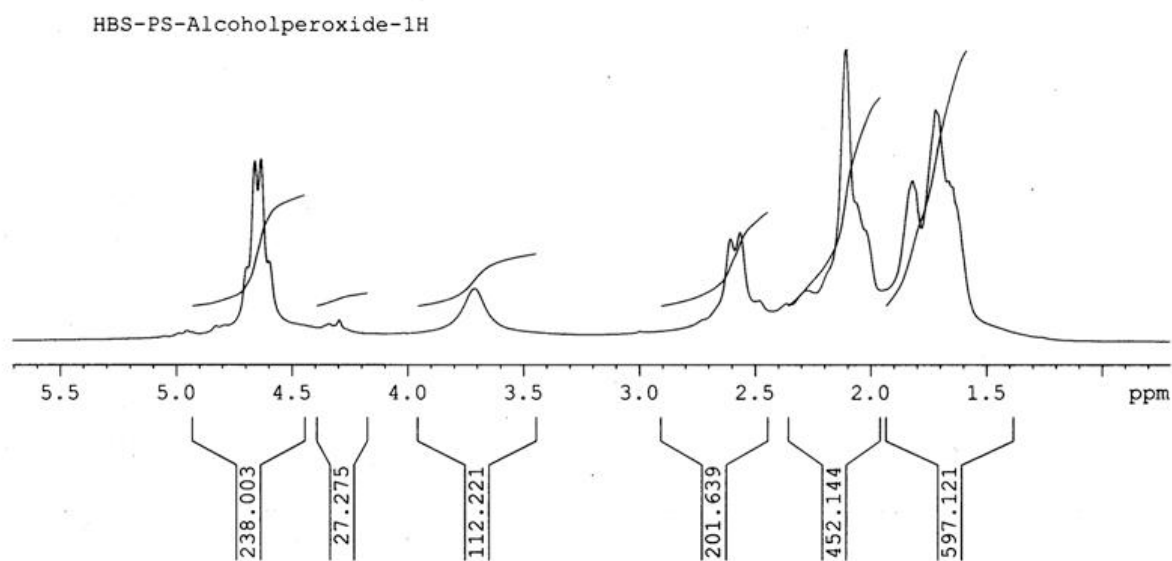

Figure S19.  $^1\text{H}$ -NMR spectrum of **22** ( $\text{CDCl}_3$ ).

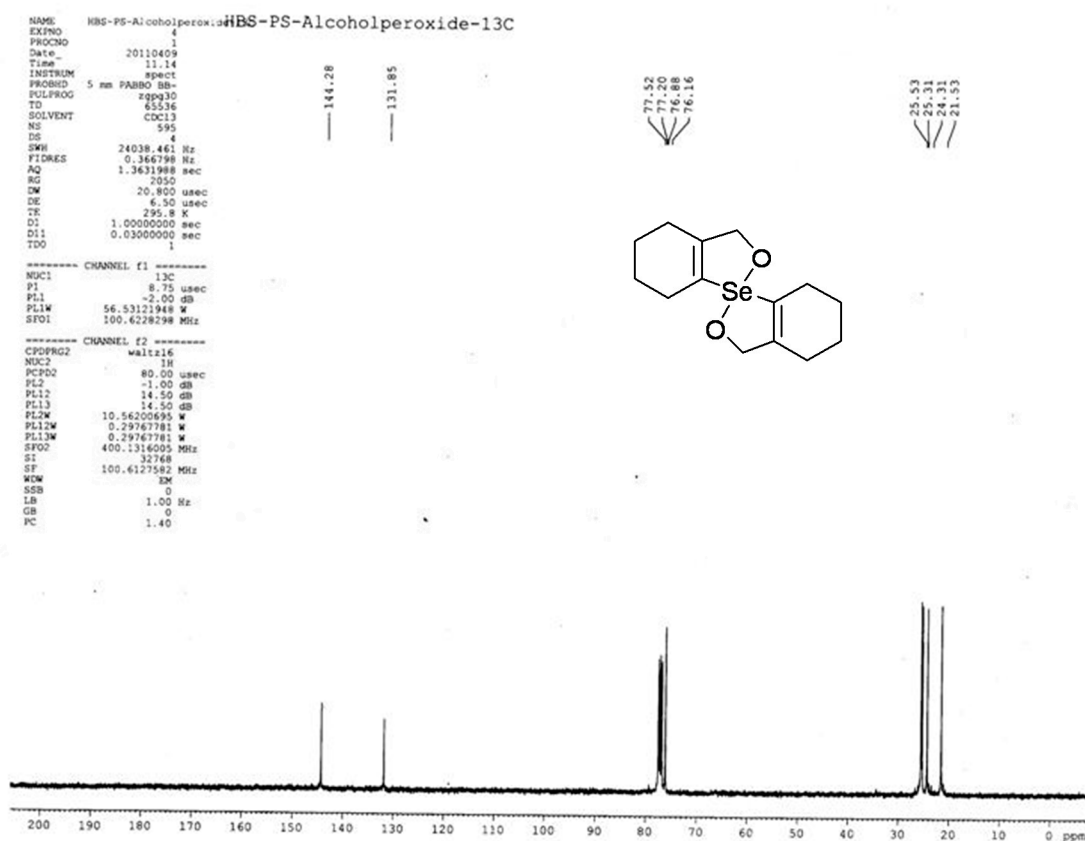

Figure S20.  $^{13}\text{C}$ -NMR spectrum of **22** ( $\text{CDCl}_3$ ).

HBS-PS-Alcoholperoxide-Se77

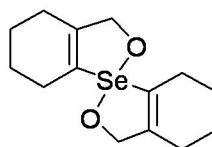

```

NAME      HBS-PS-Alcoholperoxide-Se77
EXPNO     2
PROCNO    2
Date_     20110409
Time      11.52
INSTRUM   spect
PROBHD    5 mm PABBO BB-
PULPROG   zg
TD         66540
SOLVENT   CDCl3
NS         261
DS         4
SWH        288461.531 Hz
FIDRES     4.333857 Hz
AQ         0.1154207 sec
RG         90.5
RW         1.733 usec
DE         6.50 usec
TE         298.7 K
D1         1.00000000 sec
TD0        1
  
```

----- CHANNEL f1 -----

```

NUC1       77Se
P1         10.00 usec
PL1        0.00 dB
SFO1       76.3795248 MHz
SI         65536
SF         76.3110246 MHz
WDW        EM
SSB        0
LB         10.00 Hz
GB         0
PC         0.20
  
```

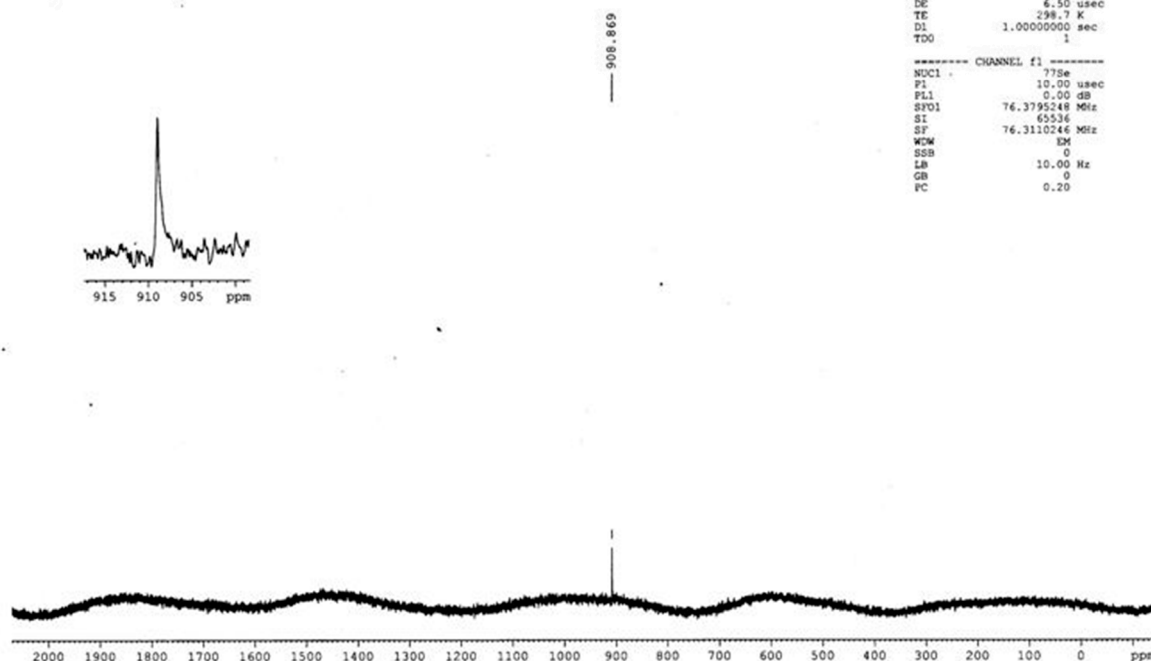Figure S21.  $^{77}\text{Se}$ -NMR spectrum of **22** ( $\text{CDCl}_3$ ).

## Elemental Composition Report

## Single Mass Analysis (displaying only valid results)

Tolerance = 10.0 PPM / DBE: min = -1.5, max = 50.0

Isotope cluster parameters: Separation = 1.0 Abundance = 1.0%

Monoisotopic Mass, Odd and Even Electron Ions

49 formula(e) evaluated with 1 results within limits (up to 50 closest results for each mass)

Micromass : Q-ToF micro (YA-105)

Dept. Of Chemistry I.I.T.(B)

27-May-201111:49:37

C<sub>14</sub>H<sub>20</sub>O<sub>2</sub>Se

HBS-PS-ALCOHOL PEROXIDE 23 (0.227) AM (Cen,5, 80.00, Ht,5000.0,556.28,1.00); Sb (5,40.00); Sm (Md, 6.00); Cm (4:28)

TOF MS ES+  
2.23e3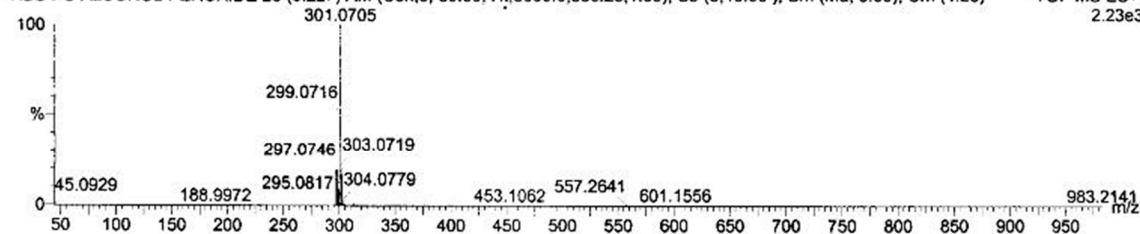

Minimum: -1.5  
Maximum: 200.0 10.0 50.0

| Mass     | Calc. Mass | mDa  | PPM  | DBE | Score | Formula                                           |
|----------|------------|------|------|-----|-------|---------------------------------------------------|
| 301.0705 | 301.0707   | -0.2 | -0.7 | 5.5 | 1     | C <sub>14</sub> H <sub>21</sub> O <sub>2</sub> Se |

Figure S22. HRMS spectrum of **22**.

Catalytic mechanism of di-(2-formylcyclohexenyl)diselenide **16** by  $^{77}\text{Se}$ -NMR spectroscopy

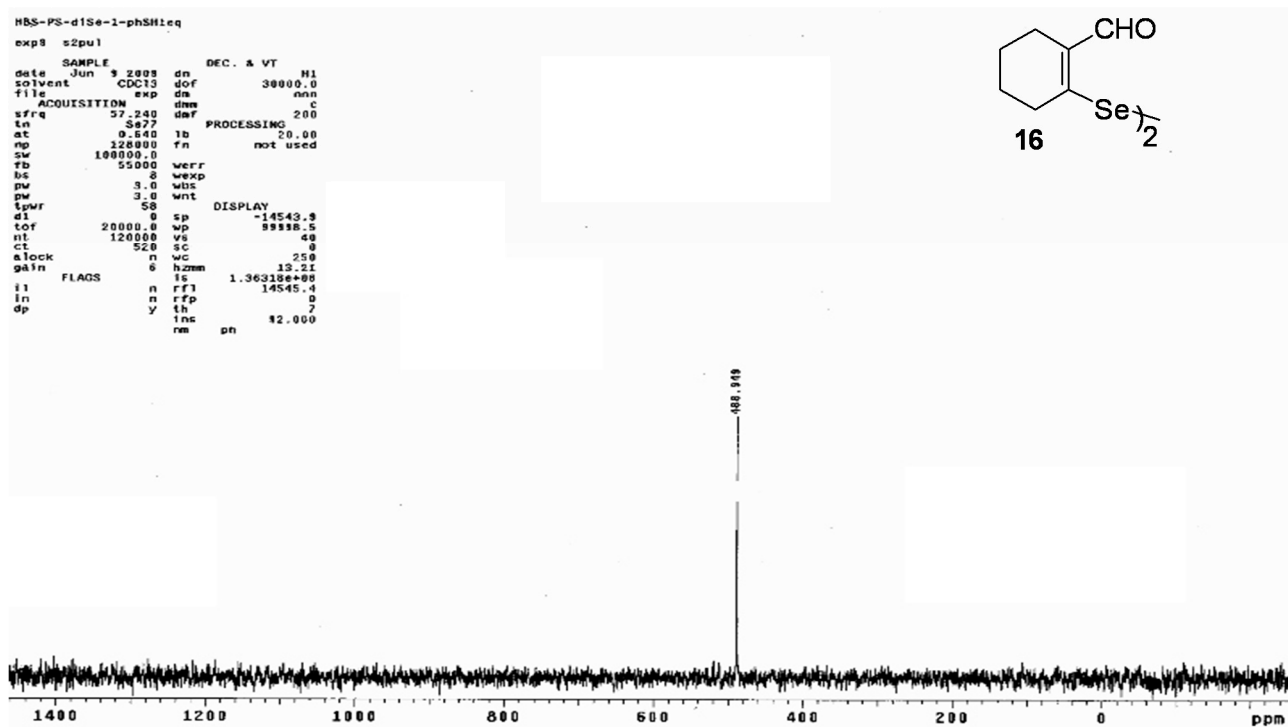

Figure S23.  $^{77}\text{Se}$ -NMR spectrum of di-(2-formylcyclohexenyl)diselenide **16** + 1PhSH.

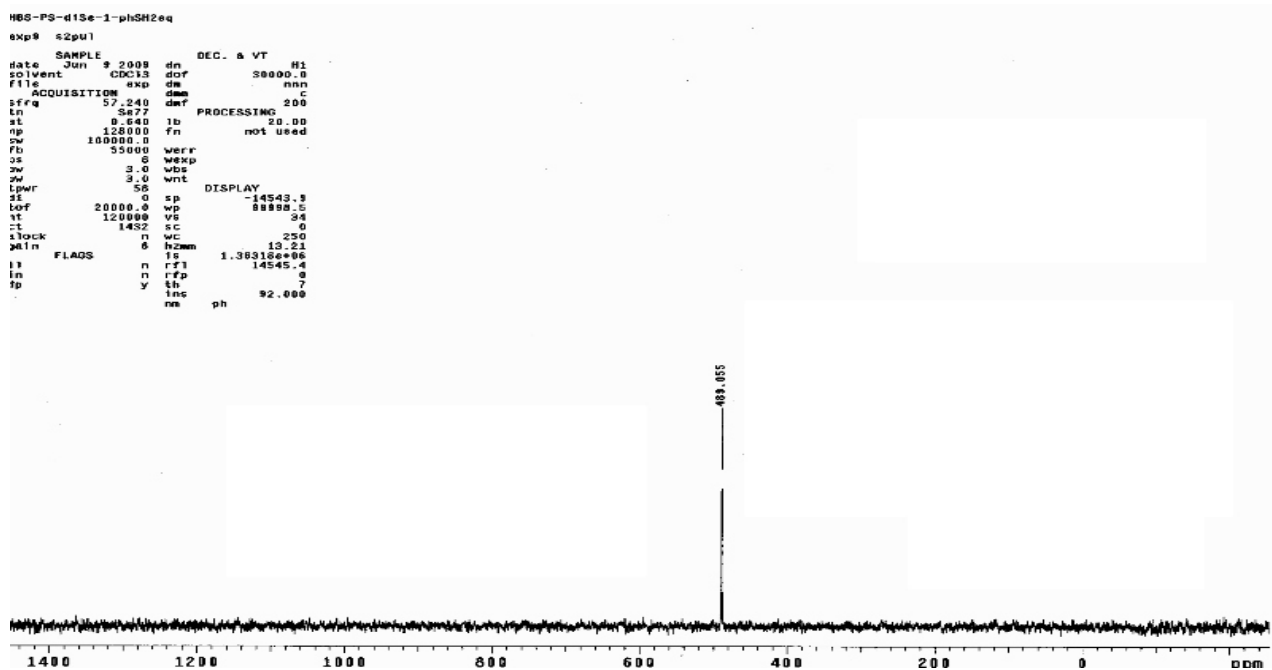

Figure S24.  $^{77}\text{Se}$ -NMR spectrum of di-(2-formylcyclohexenyl)diselenide **16** + 2PhSH.

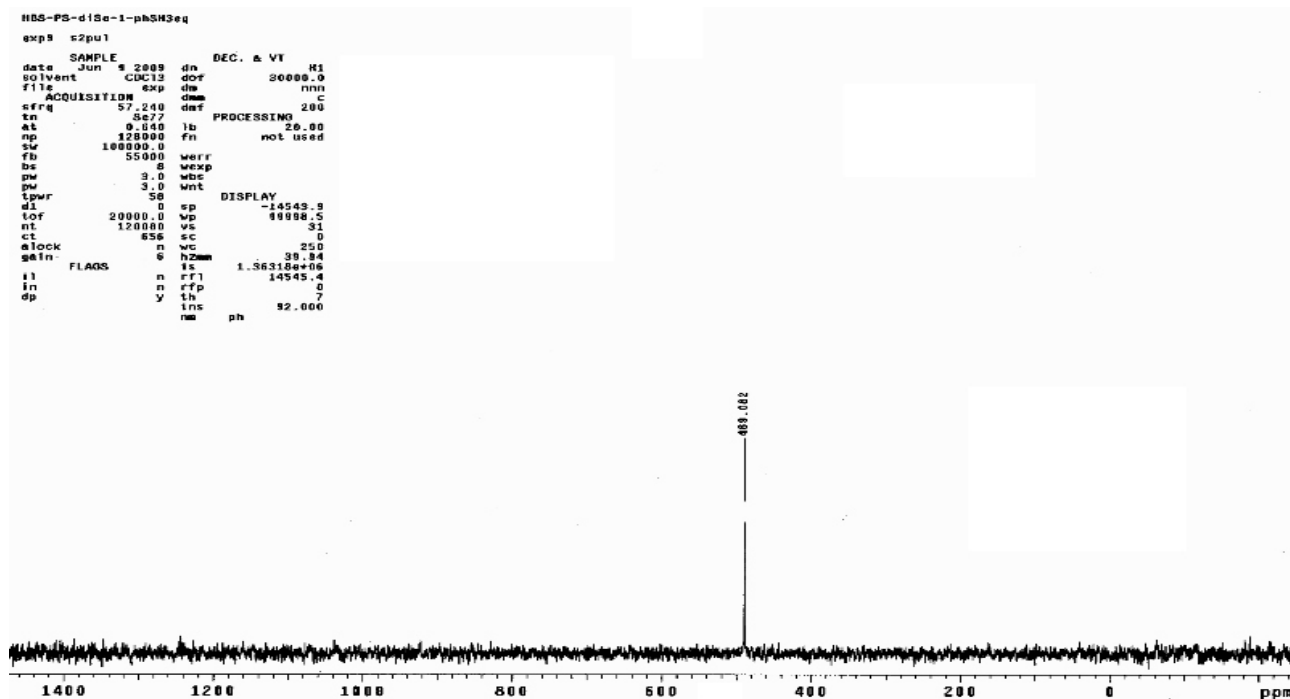

Figure S25.  $^{77}\text{Se}$ -NMR spectrum of di-(2-formylcyclohexenyl)diselenide **16** + 3PhSH.

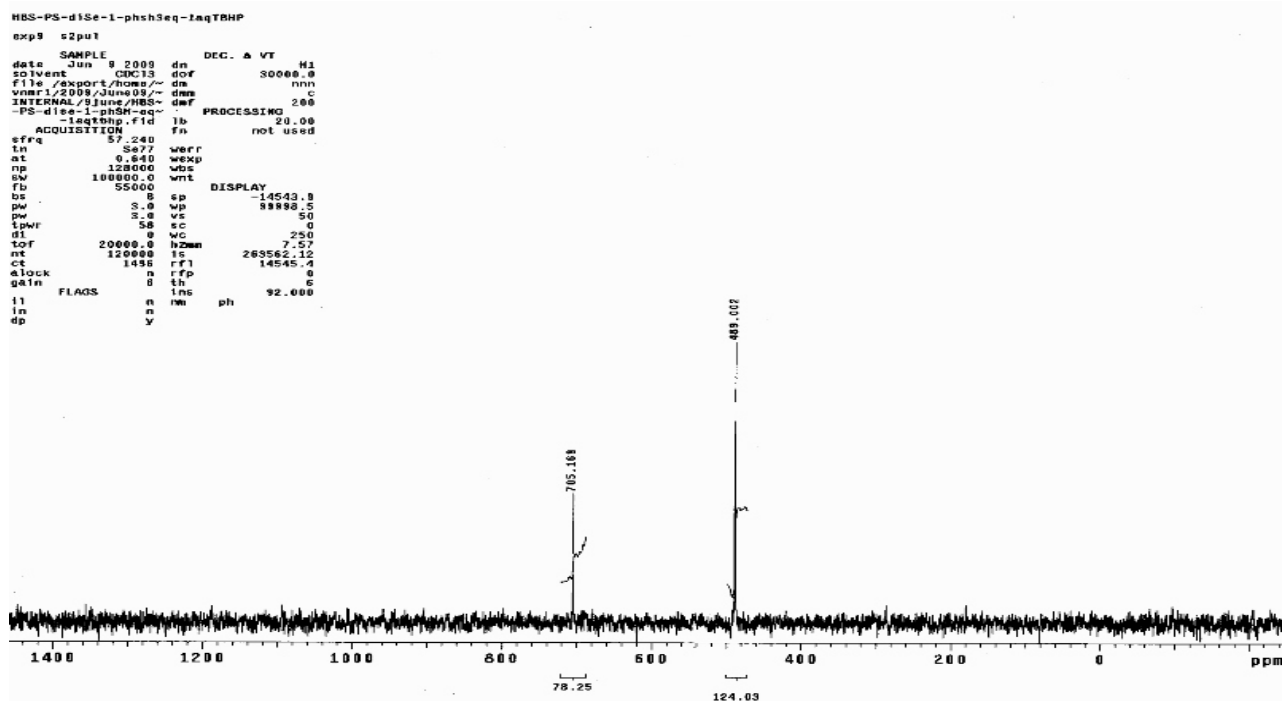

Figure S26.  $^{77}\text{Se}$ -NMR spectrum of di-(2-formylcyclohexenyl)diselenide **16** + 2PhSH + 1TBHP.

```

HBS-PS-d1Se-1-phsh12eq-3eqTBHP
exp8 s2pul
SAMPLE          DEC. & VT
date Jun 8 2008 dn H1
solvent CDCl3 dof 30000.0
file exp dm nnn
ACQUISITION    dnm 200
sfrq 57.240
tn Se77 PROCESSING 20.00
at 0.640 lb
np 128000 fn not used
sw 100000.0
fb 55000 werr
bs 8 wexp
pw 3.0 wbs
tpwr 58
d1 0 sp DISPLAY
tor 20000.0 wp -14543.8
nt 128000 vs 99998.5
ct 200 sc 0
atock n wc 250
gain 8 h2mm 8.05
FLAGS n rfl 263562.12
il n rfp 14545.4
in n rfp 0
dp y th 12
ns ins 82.000
ph

```

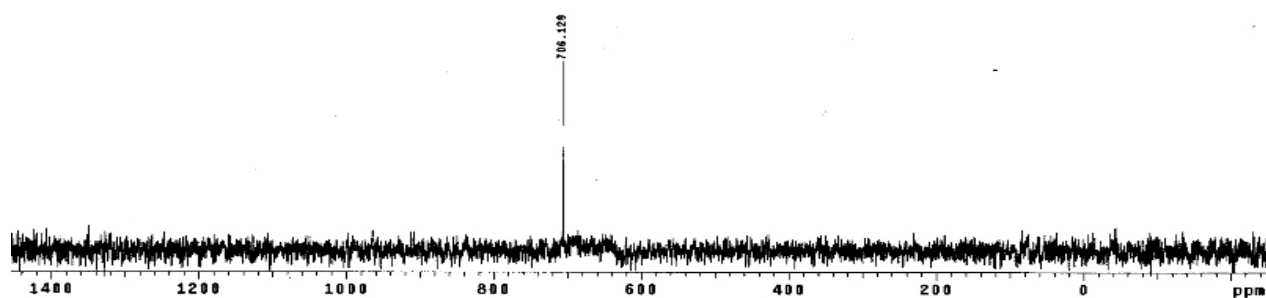

Figure S27.  $^{77}\text{Se}$ -NMR spectrum of di-(2-formylcyclohexenyl)diselenide **16** + 2PhSH + 2TBHP.

```

HBS-PS-d1Se-1-phshSeq-3eqTBHP
exp8 s2pul
SAMPLE          DEC. & VT
date Jun 8 2008 dn H1
solvent CDCl3 dof 30000.0
file exp dm nnn
ACQUISITION    dnm 200
sfrq 57.240
tn Se77 PROCESSING 20.00
at 0.640 lb
np 128000 fn not used
sw 100000.0
fb 55000 werr
bs 8 wexp
pw 3.0 wbs
tpwr 58
d1 0 sp DISPLAY
tor 20000.0 wp -14543.8
nt 128000 vs 99998.5
ct 200 sc 0
atock n wc 250
gain 8 h2mm 7.57
FLAGS n rfl 263562.12
il n rfp 14545.4
in n rfp 0
dp y th 12
ns ins 82.000
ph

```

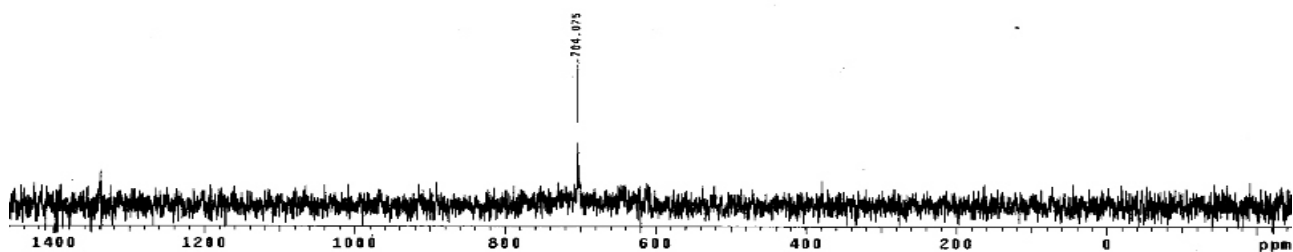

Figure S28.  $^{77}\text{Se}$ -NMR spectrum of di-(2-formylcyclohexenyl)diselenide **16** + 2PhSH + 3TBHP.

## DFT Calculations and NBO Analysis (in Gas Phase):

**Table S1.** Optimized geometries of 19 (19a anti-anti; 19b syn-anti) computed at rb3lyp/6-31+g(d) and NBO at rb3lyp/6-31+g(d).

---

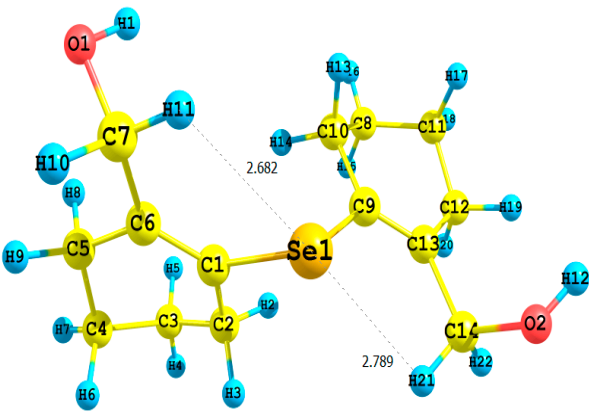

---

(19a)

---

|    |                                         |              |              |
|----|-----------------------------------------|--------------|--------------|
|    | Electronic Energy = -3096.59172317 a.u. |              |              |
| 34 | -0.101100000                            | -1.150920000 | -0.550060000 |
| 8  | 3.387008000                             | 0.785287000  | -2.475203000 |
| 1  | 2.742266000                             | 1.510171000  | -2.450220000 |
| 6  | 1.444640000                             | -0.330621000 | 0.312617000  |
| 6  | 1.266934000                             | -0.094612000 | 1.796714000  |
| 1  | 0.316572000                             | 0.428109000  | 1.970251000  |
| 1  | 1.151520000                             | -1.070446000 | 2.292775000  |
| 6  | 2.430693000                             | 0.683191000  | 2.428217000  |
| 1  | 2.368624000                             | 0.615749000  | 3.521787000  |
| 1  | 2.347338000                             | 1.749280000  | 2.170629000  |
| 6  | 3.769387000                             | 0.144086000  | 1.916149000  |
| 1  | 3.853437000                             | -0.920794000 | 2.178155000  |
| 1  | 4.609915000                             | 0.656963000  | 2.400345000  |
| 6  | 3.863165000                             | 0.308115000  | 0.394486000  |
| 1  | 4.078572000                             | 1.356119000  | 0.141493000  |
| 1  | 4.716353000                             | -0.260613000 | -0.001424000 |
| 6  | 2.606392000                             | -0.132396000 | -0.344089000 |
| 6  | 2.799521000                             | -0.355051000 | -1.827333000 |
| 1  | 3.519375000                             | -1.164339000 | -1.997770000 |
| 1  | 1.855817000                             | -0.630488000 | -2.308576000 |
| 1  | -4.393254000                            | -1.900314000 | -0.438502000 |
| 1  | -1.035408000                            | 1.595676000  | -1.753954000 |
| 1  | -0.047196000                            | 1.851585000  | -0.335227000 |
| 6  | -2.050123000                            | 2.684989000  | -0.166292000 |
| 1  | -1.860810000                            | 2.903418000  | 0.894752000  |
| 1  | -1.878959000                            | 3.618234000  | -0.717509000 |
| 1  | -3.683181000                            | 1.990602000  | -1.395693000 |
| 1  | -4.205688000                            | 2.986960000  | -0.036840000 |
| 8  | -3.580891000                            | -2.321800000 | -0.116466000 |
| 6  | -1.428436000                            | 0.221387000  | -0.168544000 |

---



|   |              |              |              |
|---|--------------|--------------|--------------|
| 6 | -1.069576000 | 1.608061000  | -0.653557000 |
| 6 | -3.495107000 | 2.205529000  | -0.333877000 |
| 6 | -3.732565000 | 0.936838000  | 0.493816000  |
| 1 | -4.690781000 | 0.478047000  | 0.203859000  |
| 1 | -3.850632000 | 1.199220000  | 1.558145000  |
| 6 | -2.621803000 | -0.097251000 | 0.371290000  |
| 6 | -2.979378000 | -1.477049000 | 0.879668000  |
| 1 | -2.089813000 | -2.019915000 | 1.201572000  |
| 1 | -3.658069000 | -1.381152000 | 1.741764000  |

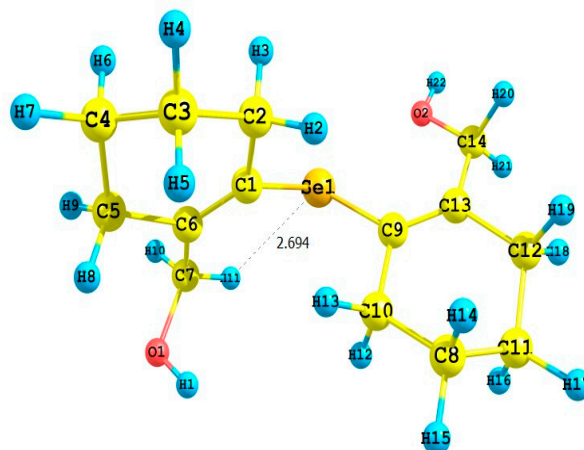

(19b)

Electronic Energy = -3096.58402319 a.u.

|    |              |              |              |
|----|--------------|--------------|--------------|
| 34 | -0.141084000 | -1.157729000 | -0.594348000 |
| 8  | 3.195890000  | 1.101337000  | -2.434587000 |
| 1  | 2.516965000  | 1.782793000  | -2.305811000 |
| 6  | 1.399219000  | -0.346131000 | 0.280559000  |
| 6  | 1.261926000  | -0.254489000 | 1.785961000  |
| 1  | 0.303816000  | 0.221769000  | 2.035914000  |
| 1  | 1.182628000  | -1.275514000 | 2.188654000  |
| 6  | 2.424125000  | 0.490559000  | 2.457965000  |
| 1  | 2.394162000  | 0.321209000  | 3.541976000  |
| 1  | 2.310905000  | 1.573822000  | 2.302636000  |
| 6  | 3.759733000  | 0.034268000  | 1.863618000  |
| 1  | 3.873324000  | -1.048264000 | 2.021917000  |
| 1  | 4.602583000  | 0.519366000  | 2.372193000  |
| 6  | 3.806876000  | 0.341584000  | 0.361981000  |
| 1  | 3.992248000  | 1.413908000  | 0.203975000  |
| 1  | 4.662135000  | -0.166299000 | -0.106272000 |
| 6  | 2.539763000  | -0.058836000 | -0.381820000 |
| 6  | 2.694546000  | -0.129898000 | -1.883856000 |
| 1  | 3.452290000  | -0.874920000 | -2.153825000 |
| 1  | 1.751023000  | -0.411780000 | -2.361353000 |
| 1  | -0.864674000 | 1.752189000  | -1.447885000 |
| 1  | -0.005287000 | 1.727395000  | 0.070109000  |
| 6  | -1.946287000 | 2.683580000  | 0.187753000  |
| 1  | -1.855454000 | 2.729125000  | 1.282945000  |

|   |              |              |              |
|---|--------------|--------------|--------------|
| 1 | -1.647177000 | 3.667183000  | -0.196697000 |
| 1 | -3.488082000 | 2.329598000  | -1.280678000 |
| 1 | -4.077893000 | 3.140128000  | 0.171901000  |
| 8 | -2.566768000 | -2.554805000 | 0.082843000  |
| 6 | -1.490564000 | 0.185206000  | -0.145933000 |
| 6 | -1.004129000 | 1.607186000  | -0.364808000 |
| 6 | -3.392576000 | 2.361259000  | -0.185787000 |
| 6 | -3.793738000 | 1.005370000  | 0.402603000  |
| 1 | -4.758386000 | 0.690142000  | -0.021022000 |
| 1 | -3.970582000 | 1.114197000  | 1.485600000  |
| 6 | -2.764893000 | -0.103314000 | 0.184190000  |
| 6 | -3.408131000 | -1.455632000 | 0.399141000  |
| 1 | -3.735752000 | -1.514492000 | 1.452961000  |
| 1 | -4.323236000 | -1.489863000 | -0.215895000 |
| 1 | -3.066882000 | -3.375440000 | 0.211061000  |

## Second Order Perturbation Theory Analysis of Fock Matrix in NBO Basis for 19a

Donor NBO (i) Acceptor NBO (j) kcal/mol a.u. a.u.

|                |                           |      |      |       |
|----------------|---------------------------|------|------|-------|
| 74. LP (2)Se 1 | /362. BD*( 1) C 18 – H 20 | 2.49 | 0.65 | 0.037 |
| 74. LP (2)Se 1 | /373. BD*( 1) C 30 – C 31 | 2.06 | 0.62 | 0.033 |
| 74. LP (2)Se 1 | /374. BD*( 1) C 30 – C 36 | 2.12 | 0.87 | 0.039 |
| 74. LP (2)Se 1 | /375. BD*( 2) C 30 – C 36 | 5.82 | 0.26 | 0.035 |
| 74. LP (2)Se 1 | /381. BD*( 1) C 37 – H 38 | 1.40 | 0.65 | 0.028 |

## Coupled Reductase Assay

The GPx-like activities of 16–20 were measured by JASCO spectrophotometer according to the literature method using ebselen as the standard. The catalytic reaction was carried out at room temperature (25 °C) in 1 mL of the solution containing 100 mM potassium phosphate buffer, pH 7.5, pH 7.48, with EDTA (1 mM), NADPH (0.01 M), GSH (0.05 M), catalysts (0.002 M), H<sub>2</sub>O<sub>2</sub> (0.026 M), GR (1.3 unit). The activity was followed by the decrease of NADPH on addition of H<sub>2</sub>O<sub>2</sub> and absorption was measured at 340 nm ( $\epsilon_{\text{max}} = 6.22 \times 10^3 \text{ M}^{-1} \text{ cm}^{-1}$ ) (Equations (1)–(3)). Each of the experiments was carried out in triplicate.

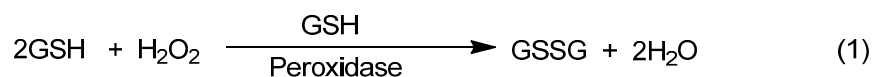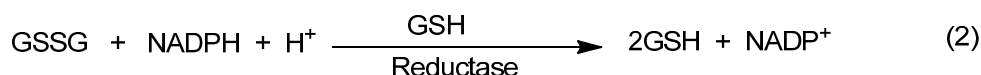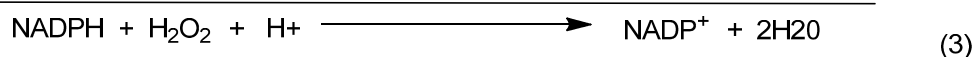

| For Control                   | Volume ( $\mu\text{L}$ ) | For Sample                    | Volume ( $\mu\text{L}$ ) |
|-------------------------------|--------------------------|-------------------------------|--------------------------|
| Buffer solution               | 940                      | Buffer solution               | 930                      |
| GSH                           | 20                       | GSH                           | 20                       |
| NADPH                         | 25                       | NADPH                         | 25                       |
| GR                            | 5                        | GR                            | 5                        |
| H <sub>2</sub> O <sub>2</sub> | 10                       | catalyst                      | 10                       |
|                               |                          | H <sub>2</sub> O <sub>2</sub> | 10                       |

Total volume of the solution was taken 1 mL.

**Table S2.** Glutathione peroxides like activity of compound **control**.

| S.N. | $\Delta A$ | Initial Reaction Rates ( $\mu\text{M min}^{-1}$ ) |
|------|------------|---------------------------------------------------|
| 1    | 0.01790    | 8.63                                              |
| 2    | 0.02369    | 11.43                                             |
| 3    | 0.02369    | 11.43                                             |

**Table S3.** Glutathione peroxides like activity of compound **Ebselen**.

| S.N. | $\Delta A$ | Initial Reaction Rates ( $\mu\text{M min}^{-1}$ ) |
|------|------------|---------------------------------------------------|
| 1    | 0.05516    | 26.60                                             |
| 2    | 0.05545    | 26.74                                             |
| 3    | 0.6249     | 30.13                                             |

**Table S4.** Glutathione peroxides like activity of compound bis(*o*-formylphenyl)diselenide.

| S.N. | $\Delta A$ | Initial Reaction Rates ( $\mu\text{M min}^{-1}$ ) |
|------|------------|---------------------------------------------------|
| 1    | 0.6664     | 32.14                                             |
| 2    | 0.07385    | 35.61                                             |
| 3    | 0.07308    | 32.24                                             |

**Table S5.** Glutathione peroxides like activity of compound **16**.

| S.N. | $\Delta A$ | Initial Reaction Rates ( $\mu\text{M min}^{-1}$ ) |
|------|------------|---------------------------------------------------|
| 1    | 0.0994     | 47.94                                             |
| 2    | 0.1056     | 50.92                                             |
| 3    | 0.1047     | 50.49                                             |

**Table S6.** Glutathione peroxides like activity of compound **17**.

| S.N. | $\Delta A$ | Initial Reaction Rates ( $\mu\text{M min}^{-1}$ ) |
|------|------------|---------------------------------------------------|
| 1    | 0.01902    | 9.17                                              |
| 2    | 0.02044    | 9.95                                              |
| 3    | 0.01863    | 8.98                                              |

**Table S7.** Glutathione peroxides like activity of compound **19**.

| S.N. | $\Delta A$ | Initial Reaction Rates ( $\mu\text{M min}^{-1}$ ) |
|------|------------|---------------------------------------------------|
| 1    | 0.01300    | 6.27                                              |
| 2    | 0.01339    | 6.45                                              |
| 3    | 0.01596    | 7.69                                              |

**Table S8.** Glutathione peroxides like activity of compound **20**.

| S.N. | $\Delta A$ | Initial Reaction Rates ( $\mu\text{M min}^{-1}$ ) |
|------|------------|---------------------------------------------------|
| 1    | 0.02781    | 13.41                                             |
| 2    | 0.03607    | 17.39                                             |
| 3    | 0.03792    | 18.28                                             |

**Table S9.** Glutathione peroxides like activity of compound **22**.

| S.N. | $\Delta A$ | Initial Reaction Rates ( $\mu\text{M min}^{-1}$ ) |
|------|------------|---------------------------------------------------|
| 1    | 0.01804    | 8.70                                              |
| 2    | 0.01716    | 8.27                                              |
| 3    | 0.01802    | 8.69                                              |
